# Supplementary material for: An internal promoter underlies the difference in disease severity between N- and C-terminal truncation mutations of Titin in zebrafish
Source: eLife journal article supplement (doi:10.7554/elife.09406), 2015-10-16
Supplement: supp [file elife-09406-supp-v1.zip]

Archive with 8 entries (8 files):
- elife_poa_e09406_Video_3.mp4
- elife_poa_e09406_Figure_4_figure_supplement_1.pdf
- elife_poa_e09406_Video_1.mp4
- elife_poa_e09406_Figure_1_figure_supplement_1.pdf
- elife_poa_e09406_Video_2.mp4
- elife_poa_e09406_Supplementary_File_1.pdf
- elife_poa_e09406_Figure_4_figure_supplement_2.pdf
- elife_poa_e09406_Figure_7_figure_supplement_1.pdf
