# Supplementary material for: An internal promoter underlies the difference in disease severity between N- and C-terminal truncation mutations of Titin in zebrafish
Source: eLife journal article supplement (doi:10.7554/elife.09406), 2015-10-16
Supplement: supp [file elife-09406-supp-v1.zip › elife_poa_e09406_Figure_7_figure_supplement_1.pdf]

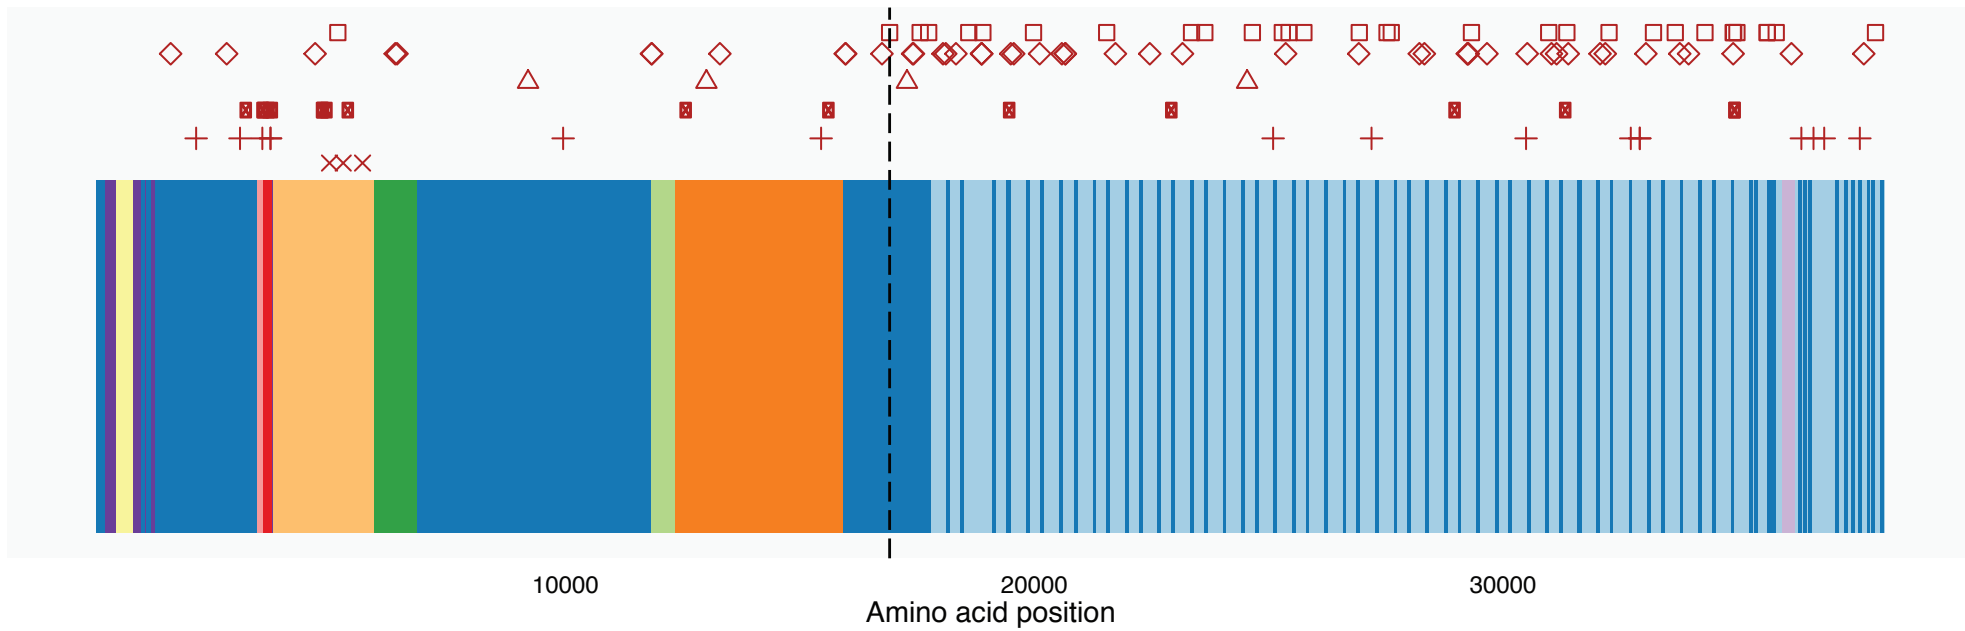

**Source** □ end-stage DCM ■ FHS △ healthy + JHS × senior athlete ◇ UK Discovery DCM

**Domain** ■ Fibronectin-3 ■ Immunoglobulin ■ N2A ■ N2B ■ Novex-1 ■ Novex-2 ■ Novex-3 ■ PEVK ■ Serine Threonine Kinase ■ Unique ■ Z-repeat
