# Supplementary material for: An internal promoter underlies the difference in disease severity between N- and C-terminal truncation mutations of Titin in zebrafish
Source: eLife journal article supplement (doi:10.7554/elife.09406), 2015-10-16
Supplement: supp [file elife-09406-supp-v1.zip › elife_poa_e09406_Supplementary_File_1.pdf]

## Supplementary File 1A

| Gene            | Disorder                     |
|-----------------|------------------------------|
| <b>AARS2</b>    | mitochondrial cardiomyopathy |
| <b>ABCC9</b>    | DCM                          |
| <b>ACTA1</b>    | research candidate           |
| <b>ACTC1</b>    | DCM,HCM,LVNC                 |
| <b>ACTN2</b>    | DCM                          |
| <b>AGK</b>      | mitochondrial cardiomyopathy |
| <b>AKAP1</b>    | research candidate           |
| <b>AKAP1</b>    | research candidate           |
| <b>AKAP10</b>   | research candidate           |
| <b>AKAP12</b>   | research candidate           |
| <b>AKAP13</b>   | research candidate           |
| <b>AKAP5</b>    | research candidate           |
| <b>AKAP6</b>    | research candidate           |
| <b>AKAP7</b>    | research candidate           |
| <b>AKAP9</b>    | LQT                          |
| <b>ANK2</b>     | LQT                          |
| <b>ANKRD1</b>   | DCM,HCM                      |
| <b>ASPH</b>     | research candidate           |
| <b>BAG3</b>     | DCM                          |
| <b>CACNA1C</b>  | LQT,Brugada                  |
| <b>CACNA2D1</b> | Brugada                      |
| <b>CACNA2D2</b> | research candidate           |
| <b>CACNA2D3</b> | research candidate           |
| <b>CACNB2</b>   | Brugada                      |
| <b>CALM1</b>    | CPVT                         |
| <b>CASQ2</b>    | CPVT                         |
| <b>CAV3</b>     | HCM, LQT                     |
| <b>CMYA5</b>    | research candidate           |
| <b>COX15</b>    | mitochondrial cardiomyopathy |

|                |                    |
|----------------|--------------------|
| <b>CRYAB</b>   | DCM,HCM            |
| <b>CSRP3</b>   | DCM,HCM            |
| <b>CTF1</b>    | DCM                |
| <b>CTNNA3</b>  | ARVC               |
| <b>DES</b>     | DCM,RCM            |
| <b>DMD</b>     | DCM                |
| <b>DNAJC19</b> | DCM                |
| <b>DPP6</b>    | VF                 |
| <b>DSC2</b>    | ARVC               |
| <b>DSG2</b>    | ARVC               |
| <b>DSP</b>     | DCM,ARVC           |
| <b>DTNA</b>    | LVNC               |
| <b>EMD</b>     | DCM                |
| <b>EYA4</b>    | DCM                |
| <b>FHL1</b>    | HCM                |
| <b>FHL2</b>    | DCM                |
| <b>FKTN</b>    | DCM                |
| <b>FLNC</b>    | research candidate |
| <b>FOXD4</b>   | DCM                |
| <b>GAA</b>     | Pompe              |
| <b>GJA1</b>    | research candidate |
| <b>GJA5</b>    | SCD                |
| <b>GLA</b>     | Fabry              |
| <b>GPD1L</b>   | Brugada            |
| <b>HCN4</b>    | Brugada            |
| <b>HRC</b>     | research candidate |
| <b>HSPB2</b>   | research candidate |
| <b>HSPB6</b>   | research candidate |
| <b>HSPB7</b>   | research candidate |
| <b>HSPB8</b>   | research candidate |
| <b>ILK</b>     | DCM                |
| <b>JPH2</b>    | HCM                |

|               |                              |
|---------------|------------------------------|
| <b>JUP</b>    | DCM,ARVC                     |
| <b>KCNA5</b>  | research candidate           |
| <b>KCND3</b>  | research candidate           |
| <b>KCNE1</b>  | LQT                          |
| <b>KCNE1L</b> | research candidate           |
| <b>KCNE2</b>  | LQT                          |
| <b>KCNE3</b>  | Brugada                      |
| <b>KCNE4</b>  | research candidate           |
| <b>KCNH2</b>  | LQT                          |
| <b>KCNIP2</b> | research candidate           |
| <b>KCNJ11</b> | research candidate           |
| <b>KCNJ2</b>  | LQT                          |
| <b>KCNJ4</b>  | research candidate           |
| <b>KCNJ8</b>  | research candidate           |
| <b>KCNK1</b>  | research candidate           |
| <b>KCNN2</b>  | research candidate           |
| <b>KCNN3</b>  | research candidate           |
| <b>KCNQ1</b>  | LQT                          |
| <b>KLF10</b>  | HCM                          |
| <b>LAMA4</b>  | DCM                          |
| <b>LAMP2</b>  | Danon                        |
| <b>LDB3</b>   | DCM,LVNC                     |
| <b>LMNA</b>   | DCM                          |
| <b>LMOD2</b>  | research candidate           |
| <b>MIB1</b>   | LVNC                         |
| <b>MRPL3</b>  | mitochondrial cardiomyopathy |
| <b>MURC</b>   | HCM                          |
| <b>MYBPC3</b> | DCM,HCM                      |
| <b>MYH6</b>   | HCM                          |
| <b>MYH7</b>   | DCM,HCM,RCM,LVNC             |
| <b>MYL2</b>   | HCM                          |
| <b>MYL3</b>   | HCM                          |

|                |                              |
|----------------|------------------------------|
| <b>MYLK2</b>   | research candidate           |
| <b>MYOM1</b>   | research candidate           |
| <b>MYOT</b>    | research candidate           |
| <b>MYOZ2</b>   | HCM                          |
| <b>MYPN</b>    | DCM                          |
| <b>NDUFAF1</b> | mitochondrial cardiomyopathy |
| <b>NDUFS2</b>  | mitochondrial cardiomyopathy |
| <b>NEBL</b>    | DCM                          |
| <b>NEXN</b>    | DCM,HCM                      |
| <b>NOS1AP</b>  | research candidate           |
| <b>NPPA</b>    | AF                           |
| <b>OBSCN</b>   | HCM                          |
| <b>PDE3A</b>   | research candidate           |
| <b>PDE4A</b>   | research candidate           |
| <b>PDE4B</b>   | research candidate           |
| <b>PDE4D</b>   | research candidate           |
| <b>PDE4DIP</b> | research candidate           |
| <b>PDLIM3</b>  | DCM                          |
| <b>PKP2</b>    | ARVC                         |
| <b>PLN</b>     | DCM                          |
| <b>PRKAG2</b>  | HCM                          |
| <b>PSEN1</b>   | DCM                          |
| <b>PSEN2</b>   | DCM                          |
| <b>RANGRF</b>  | Brugada                      |
| <b>RBM20</b>   | DCM                          |
| <b>RBM24</b>   | research candidate           |
| <b>RYR2</b>    | ARVC,CPVT                    |
| <b>SCN10A</b>  | research candidate           |
| <b>SCN1B</b>   | Brugada                      |
| <b>SCN2B</b>   | research candidate           |
| <b>SCN3B</b>   | Brugada                      |
| <b>SCN4B</b>   | LQT                          |

|                |                                        |
|----------------|----------------------------------------|
| <b>SCN5A</b>   | DCM,Brugada,LQT                        |
| <b>SCN7A</b>   | research candidate                     |
| <b>SCO2</b>    | mitochondrial cardiomyopathy           |
| <b>SDHA</b>    | DCM                                    |
| <b>SGCD</b>    | DCM                                    |
| <b>SLC25A3</b> | mitochondrial cardiomyopathy           |
| <b>SLC25A4</b> | mitochondrial cardiomyopathy           |
| <b>SLMAP</b>   | Brugada                                |
| <b>SNTA1</b>   | LQT                                    |
| <b>SVIL</b>    | research candidate                     |
| <b>SYNE1</b>   | DCM                                    |
| <b>SYNE2</b>   | DCM                                    |
| <b>SYNM</b>    | research candidate                     |
| <b>TAZ</b>     | DCM,LVNC, mitochondrial cardiomyopathy |
| <b>TCAP</b>    | DCM,HCM                                |
| <b>TGFB3</b>   | ARVC                                   |
| <b>TLN1</b>    | research candidate                     |
| <b>TMEM43</b>  | ARVC                                   |
| <b>TMEM70</b>  | mitochondrial cardiomyopathy           |
| <b>TMOD1</b>   | research candidate                     |
| <b>TMPO</b>    | DCM                                    |
| <b>TNNC1</b>   | DCM,HCM                                |
| <b>TNNI3</b>   | DCM,HCM,RCM                            |
| <b>TNNT2</b>   | DCM,HCM,RCM                            |
| <b>TPM1</b>    | DCM,HCM                                |
| <b>TRDN</b>    | CPVT                                   |
| <b>TRIM63</b>  | research candidate                     |
| <b>TTN</b>     | DCM,HCM                                |
| <b>TTR</b>     | HCM                                    |
| <b>USP13</b>   | research candidate                     |
| <b>UTRN</b>    | research candidate                     |
| <b>VCL</b>     | DCM,HCM                                |

|              |                    |
|--------------|--------------------|
| <b>VIM</b>   | research candidate |
| <b>XIRP1</b> | research candidate |
| <b>ZYX</b>   | research candidate |

## Supplementary File 1B

| Primer              | Application                   | Function                           | Sequence                                                                               |
|---------------------|-------------------------------|------------------------------------|----------------------------------------------------------------------------------------|
| Univ_UMI_RACE       | 5'RACE                        | template switching oligonucleotide | CTCAAGCTATGCAT<br>CCAACGCGNNNN/<br>ideoxyU/NNNN/<br>ideoxyU/NNNN/<br>ideoxyU/CTTrGrG+G |
| dr_e116_rt          | 5'RACE                        | reverse transcription (zebrafish)  | TTGGTTCCAGCTTT<br>GTACCC                                                               |
| mm_e224_rt          | 5'RACE                        | reverse transcription (mouse)      | TGGCCTGAGTTTTG<br>AAATCC                                                               |
| univ_f              | 5'RACE                        | PCR (mouse, zebrafish)             | CTCAAGCTATGCAT<br>CCAACGCG                                                             |
| mm_exon224_nest     | 5'RACE                        | PCR (mouse)                        | AGGGTGAGCGTGT<br>GAACTCT                                                               |
| dr_exon116_nest     | 5'RACE                        | PCR (zebrafish)                    | ATTCCACAGGTATG<br>CCCTCA                                                               |
| hs_mm_exon222/239_f | Alternative Promoter Analysis | PCR (human, mouse)                 | TCTAGTGCCACCT<br>CCGAGTTAA                                                             |
| mm_altprom_f        | Alternative Promoter Analysis | PCR (mouse)                        | GAGACAGATGCAG<br>CGCAGATTTCT                                                           |
| mm_hs_e225/242_r    | Alternative Promoter Analysis | PCR (human, mouse)                 | GACCCTGCCATCAG<br>CAACAATTTCT                                                          |
| hs_altprom_f_1      | Alternative Promoter Analysis | PCR (human)                        | GAGACAGATGCAG<br>CACAGATTTCTCG                                                         |
| dr_e115_f           | Alternative Promoter Analysis | PCR (zebrafish)                    | GCTAAATCCAAAGC<br>TCAGCTCAGAGTT                                                        |
| dr_altprom_f        | Alternative Promoter Analysis | PCR (zebrafish)                    | TCCTGGAACCTGGAGGTGA<br>CTAAC                                                           |
| dr_exon118_r        | Alternative Promoter Analysis | PCR (zebrafish)                    | AAACCACCTGACCT<br>CTGCTT                                                               |
| gRNA-n1             | CRISPR/Cas9                   | gRNA-n1                            | GGTCAGGAGCAGT<br>GGGAAGA                                                               |

|                  |                                             |           |                                |
|------------------|---------------------------------------------|-----------|--------------------------------|
| <b>gRNA-n2</b>   | CRISPR/<br>Cas9                             | gRNA-n2   | GGAGACTACAAATT<br>TGTGGC       |
| <b>gRNA-n3</b>   | CRISPR/<br>Cas9                             | gRNA-n3   | GGTGATGGTGCCG<br>CCTGTGC       |
| <b>gRNA-c1</b>   | CRISPR/<br>Cas9                             | gRNA-c1   | GGCAAACCACTGA<br>CTTCTGC       |
| <b>gRNA-c2</b>   | CRISPR/<br>Cas9                             | gRNA-c2   | GGCCAGCACCTAAA<br>GTTACT       |
| <b>gRNA-c3</b>   | CRISPR/<br>Cas9                             | gRNA-c3   | GGTACTGGGGAATT<br>CAGTGA       |
| <b>gRNA-e113</b> | CRISPR/<br>Cas9                             | gRNA-e113 | GGACTACACCGCA<br>GTCGAGA       |
| <b>gRNA-e114</b> | CRISPR/<br>Cas9                             | gRNA-e114 | GGTCCGTCCACTGT<br>ACAGTG       |
| <b>gRNA-e115</b> | CRISPR/<br>Cas9                             | gRNA-e115 | GGCTGTGAAATTAA<br>GGAGGA       |
| <b>gRNA-e116</b> | CRISPR/<br>Cas9                             | gRNA-e116 | GGCTGCGAACTGT<br>CTTATGA       |
| <b>gRNA-e122</b> | CRISPR/<br>Cas9                             | gRNA-e122 | GGAGGCTTTGTAGT<br>CCTCAT       |
| <b>n1_geno_f</b> | genotyping<br>(PCR,Cel1),<br><i>in situ</i> | mut-n1    | TGCAATAGCCAAAC<br>TCATTGAT     |
| <b>n1_geno_r</b> | genotyping<br>(PCR,Cel1),<br><i>in situ</i> | mut-n1    | AGGGACAGGCACA<br>TTTTCAG       |
| <b>n2_geno_f</b> | genotyping<br>(PCR,Cel1)                    | mut-n2    | GCTCAGAGAGTTCG<br>CATTCA       |
| <b>n2_geno_r</b> | genotyping<br>(PCR,Cel1)                    | mut-n2    | CCTTCTCTTCCAGC<br>TGTGCT       |
| <b>n3_geno_f</b> | genotyping<br>(PCR,Cel1)                    | mut-n3    | GAATGGGATCACCA<br>CCAAC        |
| <b>n3_geno_r</b> | genotyping<br>(PCR,Cel1)                    | mut-n3    | CAAGCCTTCGCTTC<br>CTTACA       |
| <b>c1_geno_f</b> | genotyping<br>(PCR,Cel1)                    | mut-c1    | TCATAACTTACCCAA<br>CACTTCCA    |
| <b>c1_geno_r</b> | genotyping<br>(PCR,Cel1)                    | mut-c1    | TGAGCCTTCAATAA<br>CCATGACT     |
| <b>c2_geno_f</b> | genotyping<br>(PCR,Cel1)                    | mut-c2    | TGAAGATTACCTAA<br>GACTTTGACACG |
| <b>c2_geno_r</b> | genotyping<br>(PCR,Cel1)                    | mut-c2    | CGTGTGTCTGCTCA<br>AAACCA       |
| <b>c3_geno_f</b> | genotyping<br>(PCR,Cel1)                    | mut-c3    | CCAGCTCTGATGCA<br>AACAGT       |

|                     |                                 |        |                                                               |
|---------------------|---------------------------------|--------|---------------------------------------------------------------|
| <b>c3_geno_r</b>    | genotyping<br>(PCR,Cel1)        | mut-c3 | AGCACCACCATCAG<br>TTCCTC                                      |
| <b>n1_as_wt_f</b>   | genotyping<br>(allele-specific) | mut-n1 | TAAAGTGTGGCTTC<br>TGTTGCGGTTCTTT<br>GTCATAGAGGTCAC<br>CCT CTC |
| <b>n1_as_mu_t_f</b> | genotyping<br>(allele-specific) | mut-n1 | TTTTCTTTGTCATAG<br>AGGTCACCCTGCTC                             |
| <b>n1_as_r</b>      | genotyping<br>(allele-specific) | mut-n1 | TAAGGATGTTGCAC<br>CACCAGAGATTG                                |
| <b>n2_as_wt_f</b>   | genotyping<br>(allele-specific) | mut-n2 | GTTTCAGCAGATCC<br>AGCCACA                                     |
| <b>n2_as_mu_t_f</b> | genotyping<br>(allele-specific) | mut-n2 | TTCAGCAGATCCAG<br>CCAA                                        |
| <b>n2_as_r</b>      | genotyping<br>(allele-specific) | mut-n2 | CCTTCTCTTCCAGC<br>TGTGCT                                      |
| <b>n3_as_wt_f</b>   | genotyping<br>(allele-specific) | mut-n3 | TTGTCAAATTTCTTA<br>ACTTCGAGTGGTGG<br>TGATGGTGCCGCCA<br>GTG    |
| <b>n3_as_mu_t_f</b> | genotyping<br>(allele-specific) | mut-n3 | TTGTGGTGGTGATG<br>GTGCCGCCTACT                                |
| <b>n3_as_r</b>      | genotyping<br>(allele-specific) | mut-n3 | ATGGTTTAGCCCTG<br>GATTTGGAT                                   |
| <b>c1_as_wt_f</b>   | genotyping<br>(allele-specific) | mut-c1 | CATCCTTCAGCCAT<br>TCAATCAGTGGCAT<br>TGGCAAACCACTGA<br>CTTCTG  |
| <b>c1_as_mu_t_f</b> | genotyping<br>(allele-specific) | mut-c1 | TTTGGCATTGGCAA<br>ACCACTGACTGGC                               |
| <b>c1_as_r</b>      | genotyping<br>(allele-specific) | mut-c1 | CGGCTCCAAGTTTG<br>CGTATGCTG                                   |
| <b>c2_as_wt_f</b>   | genotyping<br>(allele-specific) | mut-c2 | ACGTGACCCCTCCT<br>TATGACTATGTCAAC<br>ACCAATGCGCTTCC<br>AAGTA  |
| <b>c2_as_mu_t_f</b> | genotyping<br>(allele-specific) | mut-c2 | ATTGTCAACACCAA<br>TGCGCTTCCACCT                               |

|                                   |                                 |           |                                                              |
|-----------------------------------|---------------------------------|-----------|--------------------------------------------------------------|
| <b>c2_as_r</b>                    | genotyping<br>(allele-specific) | mut-c2    | GGGTCTTAGTGTCA<br>GAGCAGGATGT                                |
| <b>c3_as_wt_f</b>                 | genotyping<br>(allele-specific) | mut-c3    | ACTTACCAACTCTTT<br>CAGAACATGCAGTT<br>TCCATACTGCCTTC<br>ACTGA |
| <b>c3_as_mut_f</b>                | genotyping<br>(allele-specific) | mut-c3    | GGTGCAGTTTCCAT<br>ACTGCCTTCACTAG                             |
| <b>c3_as_r</b>                    | genotyping<br>(allele-specific) | mut-c3    | TTTAGAGTGGCTGC<br>TGTCATGCT                                  |
| <b>dr_e115/<br/>e116_qpcr_f</b>   | qPCR -<br>Cronos to FL<br>ratio | e115/e116 | TCAGCTCAGAGTTAAAGCA<br>CGA                                   |
| <b>dr_e116_q<br/>pcr_r</b>        | qPCR -<br>Cronos to FL<br>ratio | e116      | CCCTAGGAACCATTCACAG                                          |
| <b>dr_cronos<br/>_qpcr_f</b>      | qPCR -<br>Cronos to FL<br>ratio | cronos    | CAATGTCTTCTCCTGAATCC<br>AA                                   |
| <b>dr_cronos<br/>_e117_qpcr_r</b> | qPCR -<br>Cronos to FL<br>ratio | e117      | GTGTGAGATCTGCCTTCAG<br>C                                     |
| <b>mm_e222<br/>_qpcr_f</b>        | qPCR -<br>Cronos to FL<br>ratio | e222      | TTACACAACCTGCCGCCTAG<br>A                                    |
| <b>mm_e223/<br/>e224_qpcr_r</b>   | qPCR -<br>Cronos to FL<br>ratio | e223      | CAGACCAATTACCCGTGGT<br>T                                     |
| <b>mm_cronos_qpcr_f</b>           | qPCR -<br>Cronos to FL<br>ratio | cronos    | AGGCATTTTGTTTCTCTCG                                          |
| <b>mm_e224<br/>_qpcr_r</b>        | qPCR -<br>Cronos to FL<br>ratio | e224      | CTTCCTTCTGAACGTGTCA<br>CC                                    |
| <b>n1_outer_f</b>                 | NMD<br>estimate                 | mut-n1    | AGGAAGTCTGGTTGAGTTG<br>GCAG                                  |
| <b>n1_outer_r</b>                 | NMD<br>estimate                 | mut-n1    | GACACCACTATCTCTGGAAT<br>AAGCAACT                             |
| <b>n1_nest_f</b>                  | NMD<br>estimate                 | mut-n1    | GCATCTTCGCTATGGTCAG<br>GAGC                                  |

|                        |                 |        |                                   |
|------------------------|-----------------|--------|-----------------------------------|
| <b>n1_nest_r</b>       | NMD<br>estimate | mut-n1 | CAGGTCCAAACCGCTTCAT<br>CCG        |
| <b>n2_outer_f</b>      | NMD<br>estimate | mut-n2 | TGTTCACTTTGGGGATGTT<br>GGAGACT    |
| <b>n2_outer_r</b>      | NMD<br>estimate | mut-n2 | GATGTGCTTGGTGA<br>ACTCAATGACTC    |
| <b>n3_outer_f</b>      | NMD<br>estimate | mut-n3 | GCAAAGCTACCAATGAGGC<br>TGGT       |
| <b>n3_outer_r</b>      | NMD<br>estimate | mut-n3 | TCTTTGGCACCTCAATGAA<br>GAACAAG    |
| <b>c1_outer_f</b>      | NMD<br>estimate | mut-c1 | GCTACAATAAGAGGAAGGC<br>CAGCA      |
| <b>c1_outer_r</b>      | NMD<br>estimate | mut-c1 | TCGGGAATGACGAGGAAG<br>GTC         |
| <b>c1_nest_f</b>       | NMD<br>estimate | mut-c1 | GCGTATGCTGAAACACTTC<br>AAGGG      |
| <b>c1_nest_r</b>       | NMD<br>estimate | mut-c1 | CATCATCCTTCAGCCATTCA<br>ATCTTTGG  |
| <b>c2_outer_f</b>      | NMD<br>estimate | mut-c2 | AAGGGTCTTAGTGTCAGAG<br>CAGGA      |
| <b>c2_outer_r</b>      | NMD<br>estimate | mut-c2 | CAGTTGCGTCCAGTCCACC<br>A          |
| <b>c2_nest_f</b>       | NMD<br>estimate | mut-c2 | GCTACAATAAGAGGAAGGC<br>CAGCA      |
| <b>c2_nest_r</b>       | NMD<br>estimate | mut-c2 | TCGGGAATGACGAGGAAG<br>GTC         |
| <b>c3_outer_f</b>      | NMD<br>estimate | mut-c3 | GCTTTAGAGTGGCTGCTGT<br>CAATG      |
| <b>c3_outer_r</b>      | NMD<br>estimate | mut-c3 | ATCAGGTAGCTCAATATCAG<br>GGATTTCAA |
| <b>zCronos_probe_F</b> | in situ         | cronos | GAAAGCGCTATGTGGATTT<br>GTAG       |

|                                    |                                |        |                                                        |
|------------------------------------|--------------------------------|--------|--------------------------------------------------------|
| <b>zCronos_<br/>probe_T7<br/>R</b> | in situ                        | cronos | GCGTAATACGACTCACTATA<br>GCTTTGGATTTCAGGAGAAG<br>ACATTG |
| <b>ttna_e4_q<br/>pcr_f</b>         | ttna<br>morpholino<br>efficacy | qPCR   | TGAGGAAGAAGCCGTACCT<br>G                               |
| <b>ttna_e4_e<br/>5_qpcr_r</b>      | ttna<br>morpholino<br>efficacy | qPCR   | CGAGCTTCCACTCTCTT<br>CTCC                              |
