# Supplementary figures and images for: An internal promoter underlies the difference in disease severity between N- and C-terminal truncation mutations of Titin in zebrafish
Source: eLife journal article supplement (doi:10.7554/elife.09406), 2015-10-16

Figure 4 - figure supplement 1

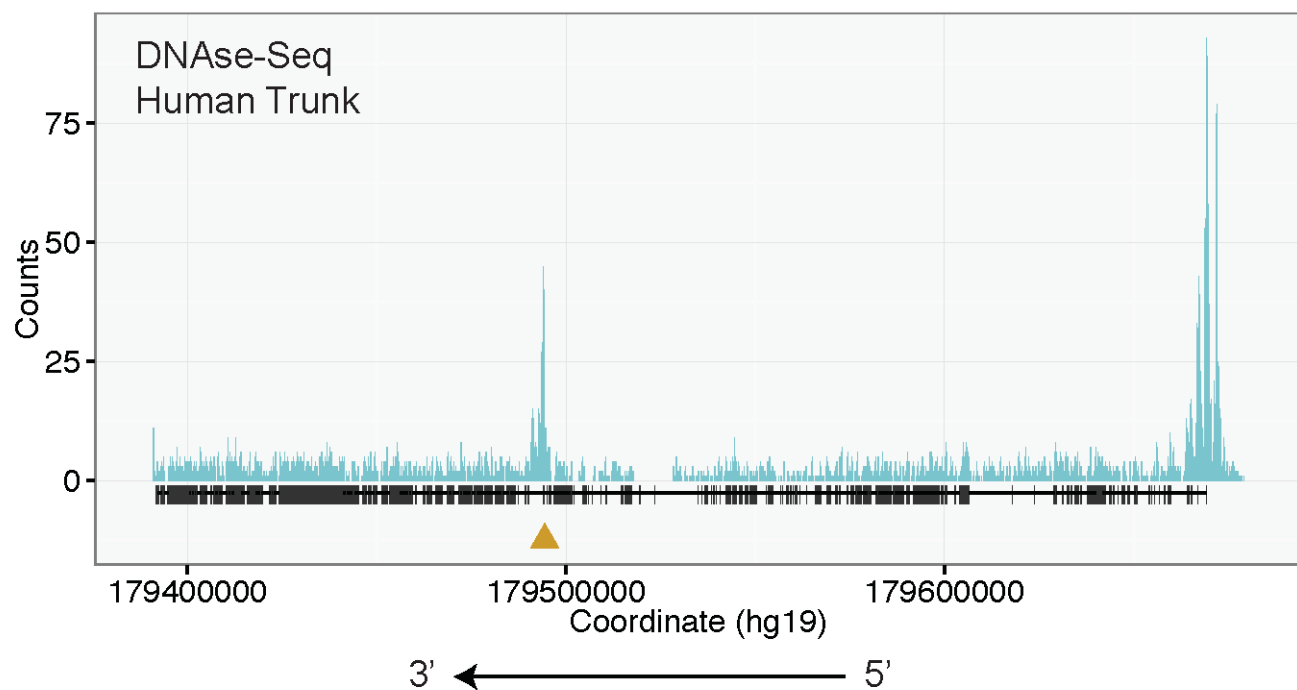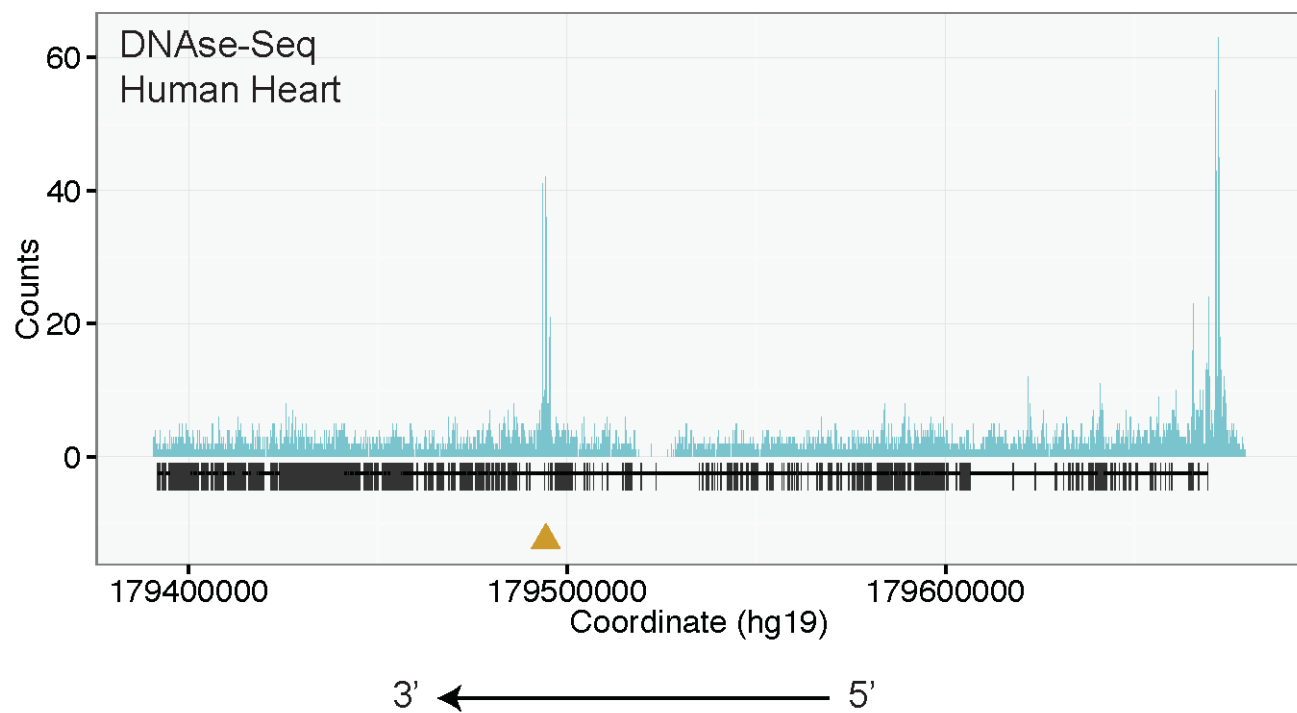

Supplement: supp [file elife-09406-supp-v1.zip › elife_poa_e09406_Figure_4_figure_supplement_1.pdf]

Figure 1 - figure supplement 1

human TTN

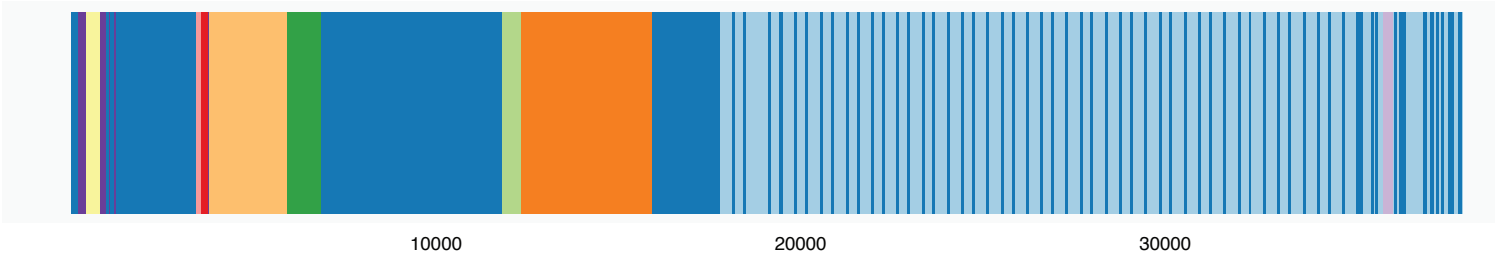

zebrafish ttna

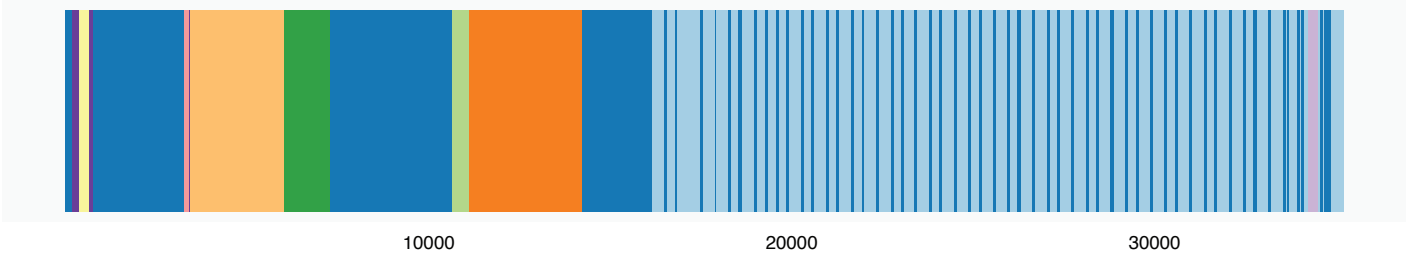

zebrafish ttnb

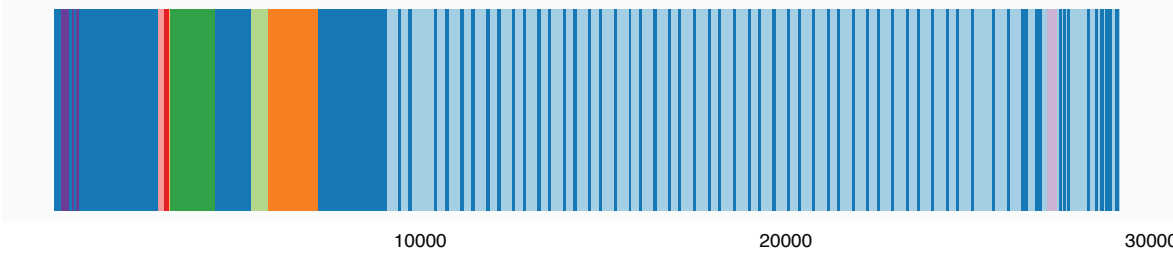

Amino acid position

Domain

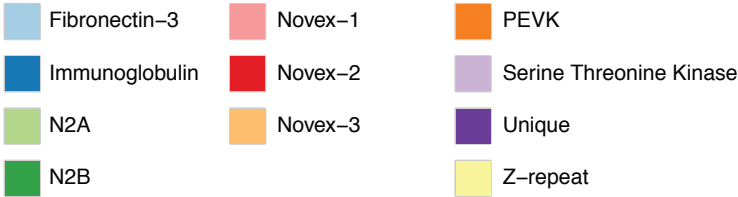

Supplement: supp [file elife-09406-supp-v1.zip › elife_poa_e09406_Figure_1_figure_supplement_1.pdf]

Figure 4 - figure supplement 2

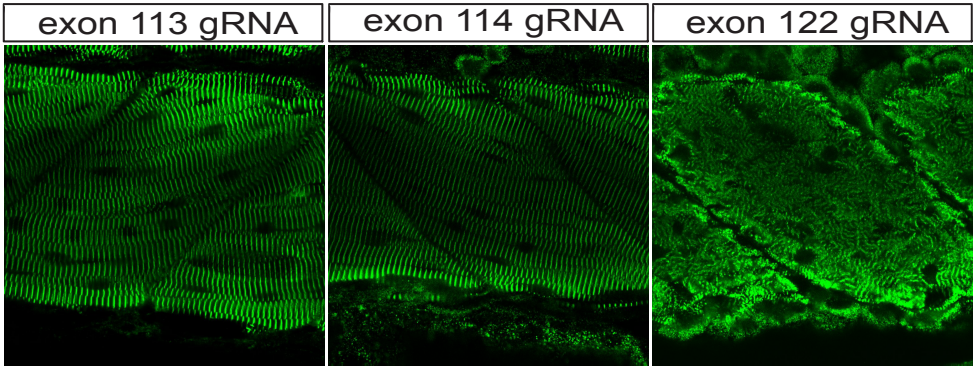

Supplement: supp [file elife-09406-supp-v1.zip › elife_poa_e09406_Figure_4_figure_supplement_2.pdf]
